# Supplementary material for: Impact of Functional Polymorphisms on Drug Survival of Biological Therapies in Patients with Moderate-to-Severe Psoriasis
Source: MDPI journal article supplement (doi:10.3390/ijms24108703), 2023-05-12

Table S2. Drug survival for all biological therapies according to therapeutic targets.-DUDA

| Drugs by therapeutic target | Drug Survival- All treatments |        |          |       |                  |                      |           |         |
|-----------------------------|-------------------------------|--------|----------|-------|------------------|----------------------|-----------|---------|
|                             | N                             | Events | MST (mo) | IC95% | Log-Rank p-value | Univariate Cox Model |           |         |
|                             |                               |        |          |       |                  | HR                   | IC95%     | p-value |
| ANTI-TNF                    | 247                           | 193    | 24       | 18-31 | 0.07             | 1                    |           |         |
| ANTI-IL12/23                | 132                           | 87     | 36       | 25-44 |                  | 0.75                 | 0.58-0.97 | 0.0316  |

MST: median survival time (months)

HR: hazard ratio

IC95%: 95% confidence interval

NA: not achieved

Anti-TNF: Tumour Necrosis Factor inhibitor (Adalimumab, Certolizumab pegol, Etanercept and Infliximab)

Anti-IL12/23: interleukin 12 and interleukin 23 inhibitor (Ustekinumab)

Statistically significant values are coloured in grey, tendency to significance in bold.

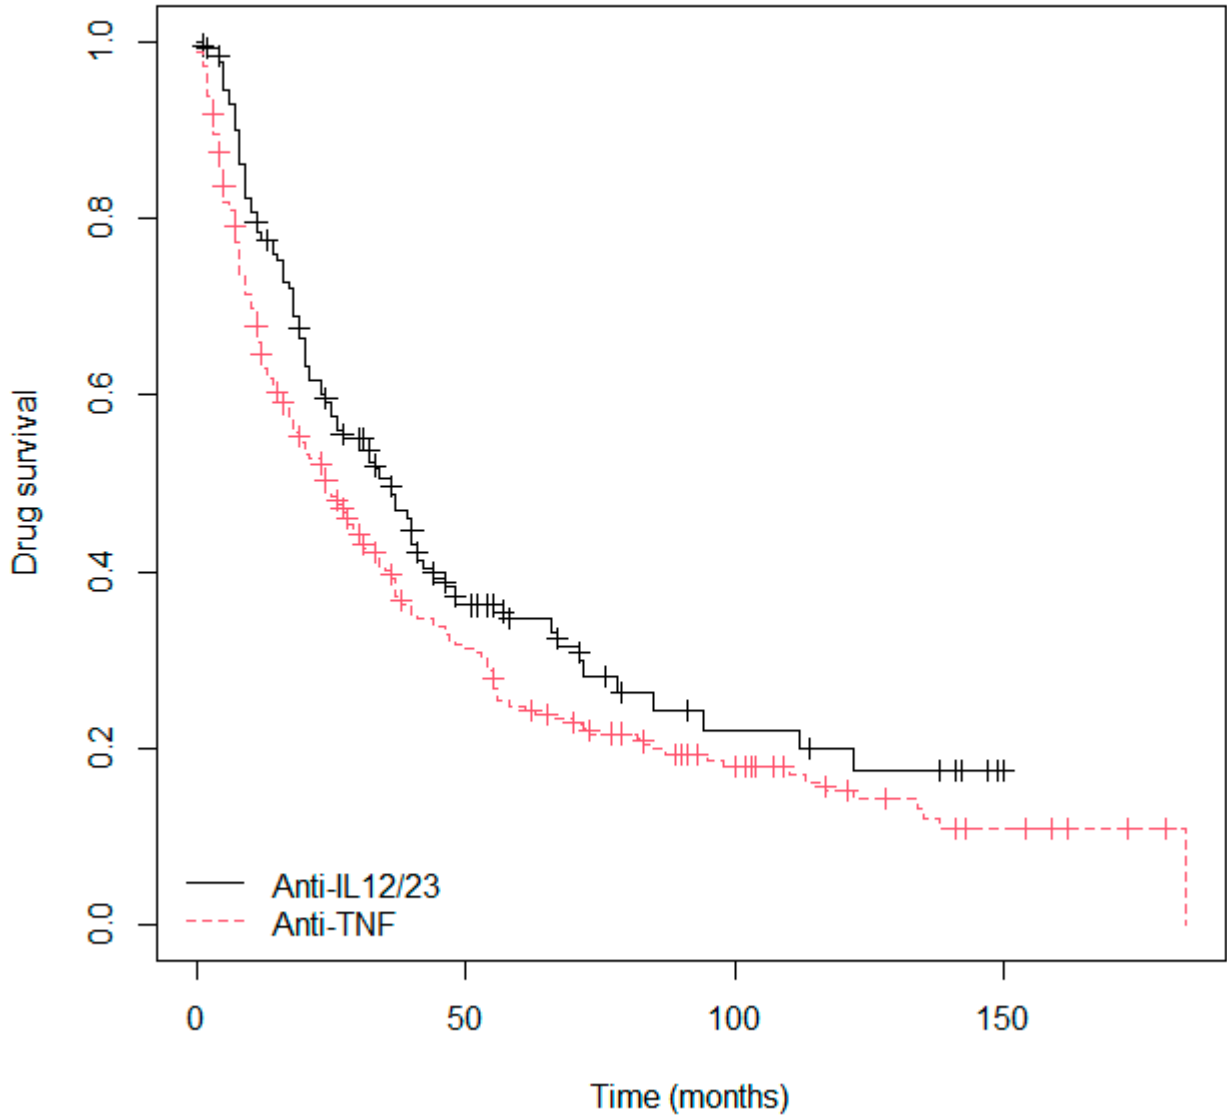

Supplement: s1 [file s1]
