# Supplementary material for: Impact of Functional Polymorphisms on Drug Survival of Biological Therapies in Patients with Moderate-to-Severe Psoriasis
Source: MDPI journal article supplement (doi:10.3390/ijms24108703), 2023-05-12
Supplement: s1 [file s1]

## Supplementary Materials Figures

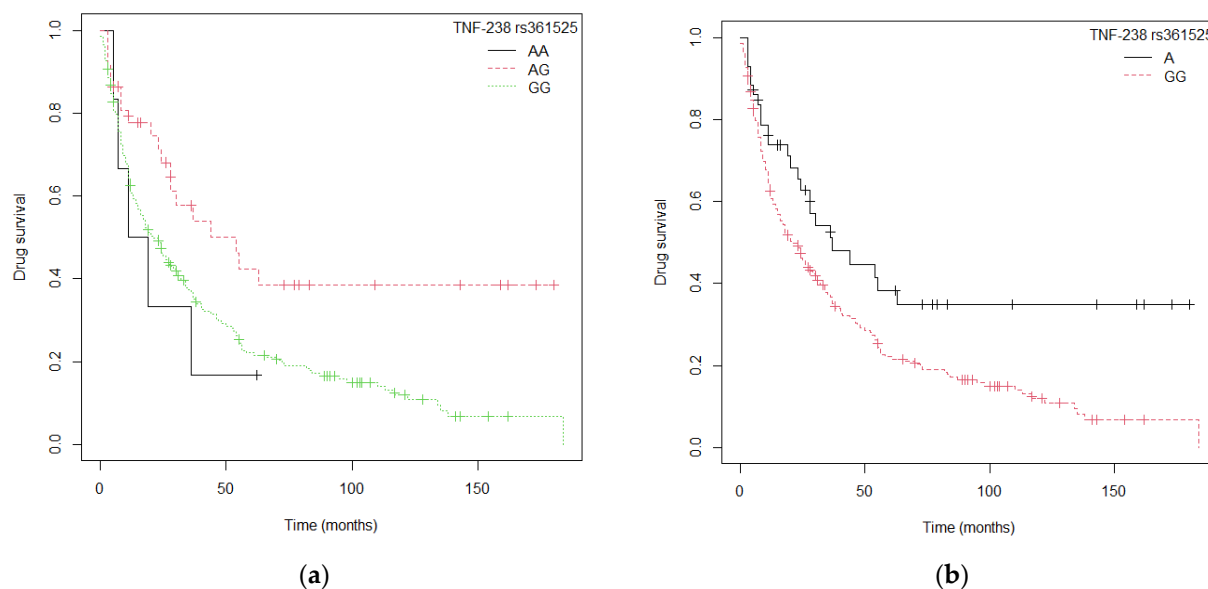

**Figure S1.** The Kaplan-Meier survival curves of anti-TNF and *TNF*-238 rs361525. (a) genotypes; (b) Allele A.

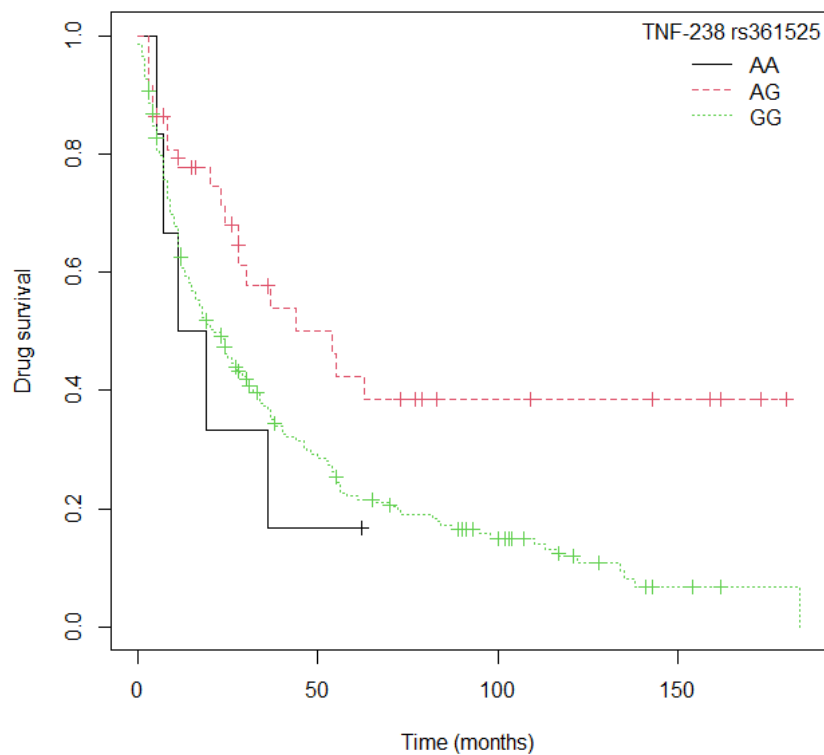

**Figure S2.** The Kaplan-Meier survival curves of anti-TNF and *TNF*-308 rs1800629, genotypes.

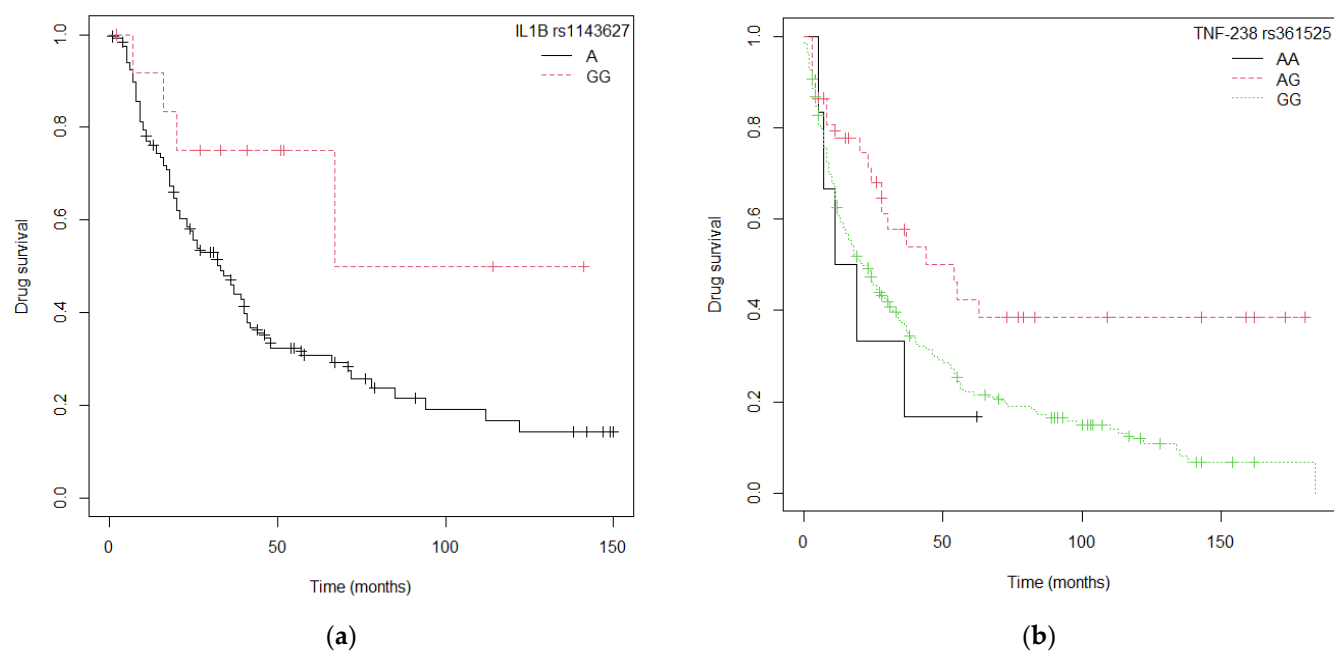

**Figure S3.** The Kaplan-Meier survival curves of UTK and *IL1B* rs1143627. (a) genotypes, (b) allele A vs. GG.

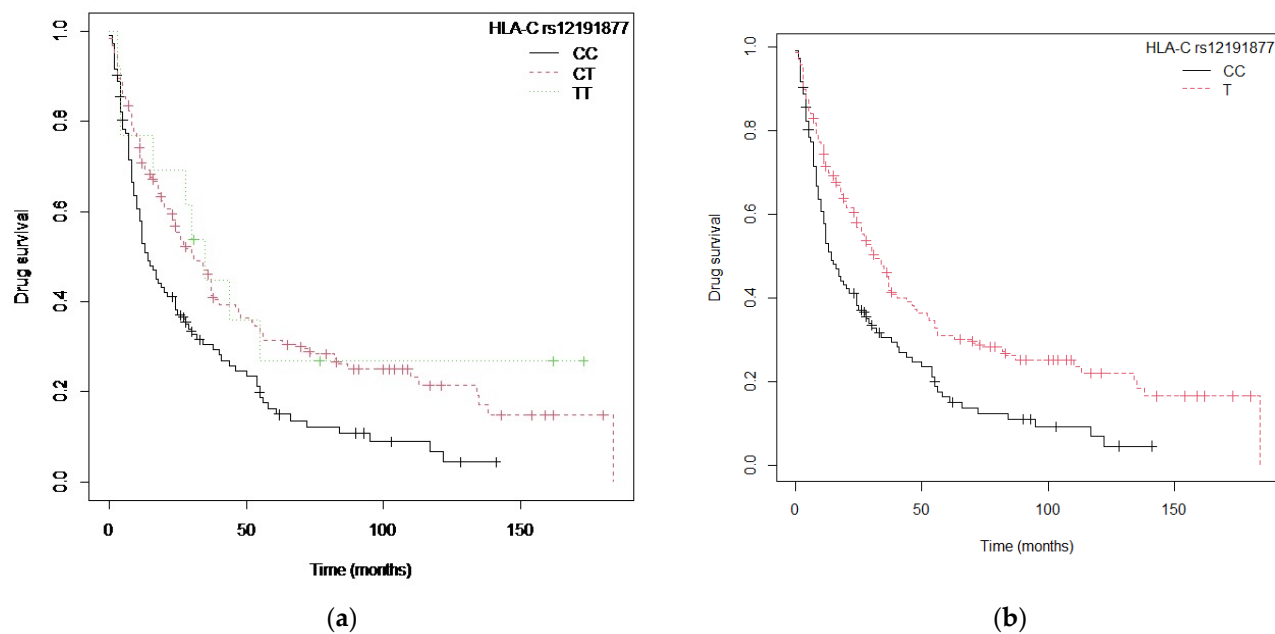

**Figure S4.** The Kaplan-Meier survival curve of UTK and *HLA-C* rs12191877. (a) Allele T, (b) genotypes.
