# Supplementary material for: Impact of Functional Polymorphisms on Drug Survival of Biological Therapies in Patients with Moderate-to-Severe Psoriasis
Source: MDPI journal article supplement (doi:10.3390/ijms24108703), 2023-05-12
Supplement: s1 [file s1]

Table S10. Polymorphisms and association with drug survival of the Anti-IL12/23 treatment patients.

| Gene              | SNPs                        | Genotype | Drug Survival (months)- Anti-IL12/23- (N=132) |        |          |        |                  |                      |           |              |
|-------------------|-----------------------------|----------|-----------------------------------------------|--------|----------|--------|------------------|----------------------|-----------|--------------|
|                   |                             |          | N                                             | Events | MST (mo) | IC95%  | Log-Rank p-value | Univariate Cox Model |           |              |
|                   |                             |          |                                               |        |          |        |                  | HR                   | IC95%     | p-value      |
| <i>HLA-B/MICA</i> | <i>rs13437088</i>           | AA       | 13                                            | 8      | 30       | 9-NA   | 0.5              |                      |           |              |
|                   |                             | AC       | 58                                            | 36     | 33       | 25-57  |                  |                      |           |              |
|                   |                             | CC       | 60                                            | 42     | 36       | 21-67  |                  |                      |           |              |
|                   |                             | A        | 71                                            | 44     | 33       | 23-57  | 0.4              |                      |           |              |
|                   |                             | C        | 118                                           | 78     | 36       | 25-44  | 0.5              |                      |           |              |
| <i>HLA-C</i>      | <i>rs12191877</i>           | CC       | 70                                            | 51     | 25       | 20-42  | 0.2              |                      |           |              |
|                   |                             | CT       | 57                                            | 34     | 39       | 32-85  |                  |                      |           |              |
|                   |                             | TT       | 5                                             | 2      | NA       | 25-NA  |                  |                      |           |              |
|                   |                             | C        | 127                                           | 85     | 36       | 25-42  | 0.4              |                      |           |              |
|                   |                             | T        | 62                                            | 36     | 39       | 32-112 | <b>0.06</b>      | 0.668                | 0.43-1.02 | <b>0.066</b> |
| <i>TNF-α</i>      | <i>(TNF-238) rs361525</i>   | GG       | 105                                           | 69     | 37       | 23-48  | 0.4              |                      |           |              |
|                   |                             | AG       | 26                                            | 18     | 33       | 21-NA  |                  |                      |           |              |
|                   |                             | AA       | 1                                             | 0      | NA       | NA-NA  |                  |                      |           |              |
|                   |                             | G        | 131                                           | 87     | 36       | 25-42  | 0.2              |                      |           |              |
|                   |                             | A        | 27                                            | 18     | 34.5     | 21-NA  | 1                |                      |           |              |
|                   | <i>(TNF-857) rs1799724</i>  | CC       | 101                                           | 68     | 34       | 21-48  | 0.6              |                      |           |              |
|                   |                             | CT       | 31                                            | 19     | 36       | 25-NA  |                  |                      |           |              |
|                   |                             | T        | 31                                            | 19     | 36       | 25-NA  | 0.6              |                      |           |              |
|                   | <i>(TNF-308) rs1800629</i>  | GG       | 91                                            | 60     | 36       | 25-46  | 0.7              |                      |           |              |
|                   |                             | AG       | 41                                            | 27     | 32       | 23-94  |                  |                      |           |              |
|                   |                             | A        | 41                                            | 27     | 32       | 23-94  | 0.7              |                      |           |              |
|                   | <i>(TNF-1031) rs1799964</i> | TT       | 76                                            | 52     | 34       | 20-48  | 0.6              |                      |           |              |
|                   |                             | CT       | 42                                            | 27     | 36       | 27-NA  |                  |                      |           |              |
|                   |                             | CC       | 14                                            | 8      | 40       | 19-NA  |                  |                      |           |              |
|                   |                             | T        | 118                                           | 79     | 34       | 25-44  | 0.4              |                      |           |              |
|                   |                             | C        | 56                                            | 35     | 36       | 27-71  | 0.4              |                      |           |              |
| <i>TNFRSF1B</i>   | <i>rs1061622</i>            | TT       | 77                                            | 53     | 36       | 20-48  | 0.6              |                      |           |              |
|                   |                             | GT       | 45                                            | 28     | 37       | 23-67  |                  |                      |           |              |
|                   |                             | GG       | 10                                            | 6      | 26       | 21-NA  |                  |                      |           |              |
|                   |                             | T        | 122                                           | 81     | 36       | 25-44  | 0.6              |                      |           |              |
|                   |                             | G        | 55                                            | 34     | 37       | 23-67  | 0.4              |                      |           |              |
| <i>TNFAIP3</i>    | <i>rs610604</i>             | GG       | 24                                            | 19     | 33       | 19-67  | 0.5              |                      |           |              |
|                   |                             | GT       | 62                                            | 39     | 36       | 23-57  |                  |                      |           |              |
|                   |                             | TT       | 46                                            | 29     | 40       | 21-94  |                  |                      |           |              |
|                   |                             | G        | 86                                            | 58     | 33       | 23-42  | 0.6              |                      |           |              |
|                   |                             | T        | 108                                           | 68     | 37       | 26-57  | 0.2              |                      |           |              |
| <i>IL1B</i>       | <i>rs1143623</i>            | CC       | 75                                            | 48     | 40       | 24-75  | 0.2              |                      |           |              |
|                   |                             | CG       | 49                                            | 36     | 27       | 20-40  |                  |                      |           |              |
|                   |                             | GG       | 8                                             | 3      | 67       | 16-NA  |                  |                      |           |              |
|                   |                             | C        | 124                                           | 84     | 34       | 25-41  | 0.2              |                      |           |              |
|                   |                             | G        | 57                                            | 39     | 34       | 20-66  | 0.3              |                      |           |              |
|                   | <i>rs1143627</i>            | GG       | 13                                            | 4      | 67       | 67-NA  | 0.03             | 0.293                | 0.10-0.81 | 0.019        |
|                   |                             | AG       | 62                                            | 45     | 27       | 18-40  |                  | 1                    |           |              |
|                   |                             | AA       | 57                                            | 38     | 40       | 23-78  |                  | 0.701                | 0.45-1.08 | 0.111        |
|                   |                             | G        | 75                                            | 49     | 34       | 23-48  | 0.4              |                      |           |              |
|                   |                             | A        | 119                                           | 83     | 33       | 24-41  | 0.03             | 0.352                | 0.12-0.96 | 0.0417       |
| <i>IL6</i>        | <i>rs1800795</i>            | CC       | 19                                            | 14     | 42       | 33-NA  | 0.6              |                      |           |              |
|                   |                             | CG       | 50                                            | 34     | 32       | 19-78  |                  |                      |           |              |

|                               |                   |    |     |    |      |        |             |       |              |
|-------------------------------|-------------------|----|-----|----|------|--------|-------------|-------|--------------|
|                               |                   | GG | 63  | 39 | 37   | 23-57  |             |       |              |
|                               |                   | C  | 69  | 48 | 34   | 21-67  | 0.7         |       |              |
|                               |                   | G  | 113 | 73 | 32   | 23-44  | 0.5         |       |              |
| <i>IL12<math>\beta</math></i> | <i>rs3213094</i>  | CC | 71  | 45 | 34   | 23-71  | 0.8         |       |              |
|                               |                   | CT | 56  | 39 | 36   | 23-57  |             |       |              |
|                               |                   | TT | 4   | 2  | 32   | 9-NA   |             |       |              |
|                               |                   | C  | 127 | 84 | 36   | 25-44  | 0.5         |       |              |
|                               |                   | T  | 60  | 41 | 36   | 25-57  | 0.9         |       |              |
|                               | <i>rs2546890</i>  | AA | 22  | 13 | 41   | 23-NA  | 0.6         |       |              |
|                               |                   | AG | 75  | 49 | 37   | 24-48  |             |       |              |
|                               |                   | GG | 35  | 25 | 33   | 16-67  |             |       |              |
|                               |                   | A  | 97  | 62 | 37   | 25-48  | 0.3         |       |              |
|                               |                   | G  | 110 | 74 | 36   | 24-44  | 0.5         |       |              |
| <i>TIRAP</i>                  | <i>rs8177374</i>  | CC | 88  | 58 | 37   | 26-48  | 1           |       |              |
|                               |                   | CT | 33  | 22 | 26   | 21-NA  |             |       |              |
|                               |                   | TT | 11  | 7  | 40   | 20-NA  |             |       |              |
|                               |                   | C  | 121 | 80 | 34   | 25-44  | 1           |       |              |
|                               |                   | T  | 44  | 29 | 27   | 21-NA  | 0.8         |       |              |
| <i>PGLYR4-24</i>              | <i>rs2916205</i>  | CT | 34  | 24 | 37   | 16-122 | 0.9         |       |              |
|                               |                   | TT | 98  | 63 | 34   | 25-48  |             |       |              |
|                               |                   | C  | 34  | 24 | 37   | 16-122 | 0.9         |       |              |
| <i>CDKALI</i>                 | <i>rs6908425</i>  | TT | 3   | 3  | 32   | 26-NA  | 0.9         |       |              |
|                               |                   | CT | 33  | 20 | 41   | 20-NA  |             |       |              |
|                               |                   | CC | 96  | 64 | 34   | 24-46  |             |       |              |
|                               |                   | T  | 36  | 23 | 40   | 23-85  | 0.7         |       |              |
|                               |                   | C  | 129 | 84 | 36   | 25-44  | 0.8         |       |              |
| <i>CD84</i>                   | <i>rs6427528</i>  | AA | 1   | 1  | 10   | NA-NA  | <b>0.07</b> | 1     |              |
|                               |                   | AG | 38  | 26 | 23   | 18-40  |             | 0.261 | 0.03-1.97    |
|                               |                   | GG | 93  | 60 | 40   | 27-66  |             | 0.181 | 0.02-1.34    |
|                               |                   | A  | 39  | 27 | 23   | 18-40  | <b>0.09</b> | 0.676 | 0.42-1.06    |
|                               |                   | G  | 131 | 86 | 36   | 26-44  | <b>0.08</b> | 0.202 | 0.03-1.49    |
| <i>IL17RA</i>                 | <i>rs4819554</i>  | GG | 5   | 2  | 57   | 57-NA  | 0.4         |       |              |
|                               |                   | AG | 36  | 23 | 21   | 15-NA  |             |       |              |
|                               |                   | AA | 91  | 62 | 36   | 26-44  |             |       |              |
|                               |                   | G  | 41  | 25 | 27   | 18-NA  | 0.9         |       |              |
|                               |                   | A  | 127 | 85 | 34   | 25-41  | 0.2         |       |              |
| <i>IL23R</i>                  | <i>rs11209026</i> | GG | 118 | 76 | 39   | 26-48  | 0.2         |       |              |
|                               |                   | AG | 14  | 11 | 18.5 | 12-NA  |             |       |              |
|                               |                   | A  | 14  | 11 | 18.5 | 12-NA  | 0.2         |       |              |
| <i>TLR2</i>                   | <i>rs4696480</i>  | TT | 23  | 15 | 33   | 21-NA  | 0.8         |       |              |
|                               |                   | AT | 56  | 41 | 32   | 21-44  |             |       |              |
|                               |                   | AA | 49  | 29 | 39   | 18-NA  |             |       |              |
|                               |                   | T  | 79  | 56 | 32   | 23-41  | 0.7         |       |              |
|                               |                   | A  | 105 | 70 | 34   | 23-48  | 0.7         |       |              |
|                               | <i>rs11938228</i> | CC | 63  | 39 | 36   | 19-67  | 0.5         |       |              |
|                               |                   | AC | 48  | 35 | 32   | 20-48  |             |       |              |
|                               |                   | AA | 18  | 12 | 40   | 23-NA  |             |       |              |
|                               |                   | C  | 111 | 74 | 32   | 23-48  | 0.4         |       |              |
|                               |                   | A  | 66  | 47 | 33   | 23-42  | 0.7         |       |              |
| <i>TLR5</i>                   | <i>rs5744174</i>  | AA | 45  | 34 | 25   | 18-40  | 0.1         |       |              |
|                               |                   | AG | 66  | 43 | 36   | 23-71  |             |       |              |
|                               |                   | GG | 21  | 10 | 41   | 37-NA  |             |       |              |
|                               |                   | A  | 111 | 77 | 32   | 23-44  | 0.2         |       |              |
|                               |                   | G  | 87  | 53 | 41   | 26-67  | <b>0.06</b> | 0.665 | 0.43-1.03    |
| <i>TLR9</i>                   | <i>rs352139</i>   | TT | 32  | 21 | 41   | 25-72  | 0.5         |       | <b>0.066</b> |
