# Supplementary material for: Impact of Functional Polymorphisms on Drug Survival of Biological Therapies in Patients with Moderate-to-Severe Psoriasis
Source: MDPI journal article supplement (doi:10.3390/ijms24108703), 2023-05-12
Supplement: s1 [file s1]

Table S6. Minor alleles frequencies of SNPs

| Chr                                           | SNP        | Minor Allele | Major Allele | MAF     |
|-----------------------------------------------|------------|--------------|--------------|---------|
| 1                                             | rs1061622  | G            | T            | 0.2447  |
| 1                                             | rs2916205  | C            | T            | 0.1368  |
| 1                                             | rs6427528  | A            | G            | 0.1526  |
| 1                                             | rs11209026 | A            | G            | 0.05789 |
| 1                                             | rs5744174  | G            | A            | 0.4158  |
| 1                                             | rs1801274  | G            | A            | 0.4328  |
| 1                                             | rs396991   | C            | A            | 0.4127  |
| 2                                             | rs1143623  | G            | C            | 0.2263  |
| 2                                             | rs1143627  | G            | A            | 0.3237  |
| 3                                             | rs352139   | T            | C            | 0.4735  |
| 4                                             | rs4696480  | T            | A            | 0.4286  |
| 4                                             | rs11938228 | A            | C            | 0.3694  |
| 5                                             | rs3213094  | T            | C            | 0.2132  |
| 5                                             | rs2546890  | A            | G            | 0.4842  |
| 6                                             | rs13437088 | A            | C            | 0.3439  |
| 6                                             | rs12191877 | T            | C            | 0.3175  |
| 6                                             | rs361525   | A            | G            | 0.1     |
| 6                                             | rs1799724  | T            | C            | 0.1316  |
| 6                                             | rs1800629  | A            | G            | 0.1263  |
| 6                                             | rs1799964  | C            | T            | 0.2526  |
| 6                                             | rs610604   | G            | T            | 0.3545  |
| 6                                             | rs6908425  | T            | C            | 0.1684  |
| 7                                             | rs1800795  | C            | G            | 0.3263  |
| 8                                             | rs11465996 | G            | C            | 0.2683  |
| 11                                            | rs8177374  | T            | C            | 0.2079  |
| 12                                            | rs11045392 | T            | C            | 0.3162  |
| 22                                            | rs4819554  | G            | A            | 0.2354  |
| Chr: Chromosome; MAF: Minor Allele Frequency. |            |              |              |         |
