# Supplementary material for: Impact of Functional Polymorphisms on Drug Survival of Biological Therapies in Patients with Moderate-to-Severe Psoriasis
Source: MDPI journal article supplement (doi:10.3390/ijms24108703), 2023-05-12
Supplement: s1 [file s1]

Table S3A. Percentages are done on the total drug discontinuations.

Table S3B. Statistical analysis of the correlation between the group of drugs studied and the reason for discontinuation using the  $\chi^2$  or Fisher test.

|                           | Anti-TNF (yes/no) |       |              | Anti-IL12/23 (yes/no) |       |         |
|---------------------------|-------------------|-------|--------------|-----------------------|-------|---------|
|                           | CI <sub>95%</sub> | OR    | p-value      | CI <sub>95%</sub>     | OR    | p-value |
| Lack of efficacy (yes/no) | 0.36-0.99         | 0.604 | 0.036        | 1.05-3.52             | 1.895 | 0.024   |
| Adverse event (yes/no)    | 0.94-3.39         | 1.768 | <b>0.056</b> | -                     | -     | 0.343   |
| Remission (yes/no)        | 1.05-21.07        | 3.835 | 0.027        | -                     | -     | 0.173*  |
| Other reasons (yes/no)    | -                 | -     | 0.354        | -                     | -     | 0.216   |

\*Fisher-test.

The results that are statistically significant (p<0.05) are coloured in grey, a tendency to significance in bold, and CI<sub>95%</sub> and OR are also indicated.
