# Supplementary material for: Impact of Functional Polymorphisms on Drug Survival of Biological Therapies in Patients with Moderate-to-Severe Psoriasis
Source: MDPI journal article supplement (doi:10.3390/ijms24108703), 2023-05-12
Supplement: s1 [file s1]

Table S1. Patients' description diagnosis with moderate-to-severe psoriasis treated with Anti-TNF and Anti-IL12/23.

| Variable                                                                                                                                                                                                                                                                                                                       | Baseline (N=198) |       |                           |
|--------------------------------------------------------------------------------------------------------------------------------------------------------------------------------------------------------------------------------------------------------------------------------------------------------------------------------|------------------|-------|---------------------------|
|                                                                                                                                                                                                                                                                                                                                | N                | %     | Mean ± standard deviation |
| <b>Sex</b>                                                                                                                                                                                                                                                                                                                     |                  |       |                           |
| Female                                                                                                                                                                                                                                                                                                                         | 104              | 52.53 | -                         |
| Male                                                                                                                                                                                                                                                                                                                           | 94               | 47.47 | -                         |
| <b>Age at baseline</b>                                                                                                                                                                                                                                                                                                         | 173              | -     | 52.81 ± 14.17             |
| <52 years                                                                                                                                                                                                                                                                                                                      | 72               | 41.62 | -                         |
| >52 years                                                                                                                                                                                                                                                                                                                      | 101              | 58.38 | -                         |
| <b>BMI at baseline</b>                                                                                                                                                                                                                                                                                                         | 196              | -     | 27.09 (23.99-31.23)       |
| Normal weight                                                                                                                                                                                                                                                                                                                  | 68               | 35.42 | -                         |
| Overweight                                                                                                                                                                                                                                                                                                                     | 64               | 33.33 | -                         |
| Obesity Type I                                                                                                                                                                                                                                                                                                                 | 35               | 18.23 | -                         |
| Obesity Type II                                                                                                                                                                                                                                                                                                                | 15               | 7.81  | -                         |
| Obesity Type III                                                                                                                                                                                                                                                                                                               | 10               | 5.21  | -                         |
| <b>COMORBIDITIES</b>                                                                                                                                                                                                                                                                                                           |                  |       |                           |
| <b>Psoriatic Arthritis</b>                                                                                                                                                                                                                                                                                                     | 89               | 44.95 | -                         |
| <b>Hypertension</b>                                                                                                                                                                                                                                                                                                            | 65               | 32.83 | -                         |
| <b>Dyslipidemia</b>                                                                                                                                                                                                                                                                                                            | 78               | 39.39 | -                         |
| <b>Other comorbidities</b>                                                                                                                                                                                                                                                                                                     | 129              | 65.15 | -                         |
| <b>Age diagnosis PS</b>                                                                                                                                                                                                                                                                                                        | 198              | -     | 28 (18-42)                |
| <b>Family history PS</b>                                                                                                                                                                                                                                                                                                       | 115              | 58.38 | -                         |
| <b>Type of PS</b>                                                                                                                                                                                                                                                                                                              |                  |       |                           |
| Plaque                                                                                                                                                                                                                                                                                                                         | 87               | 43.94 | -                         |
| Pustular                                                                                                                                                                                                                                                                                                                       | 4                | 2.02  | -                         |
| Inverse                                                                                                                                                                                                                                                                                                                        | 2                | 1.01  | -                         |
| Guttate                                                                                                                                                                                                                                                                                                                        | 6                | 3.03  | -                         |
| Combination 2 types of PS                                                                                                                                                                                                                                                                                                      | 73               | 36.87 | -                         |
| Combination 3 types of PS                                                                                                                                                                                                                                                                                                      | 25               | 12.63 | -                         |
| Combination 4 types of PS                                                                                                                                                                                                                                                                                                      | 1                | 0.51  | -                         |
| <b>Location of lesions PS</b>                                                                                                                                                                                                                                                                                                  |                  |       |                           |
| Trunk and lower and upper limbs                                                                                                                                                                                                                                                                                                | 178              | 89.9  | -                         |
| Scalp and face                                                                                                                                                                                                                                                                                                                 | 127              | 64.14 | -                         |
| Nails                                                                                                                                                                                                                                                                                                                          | 82               | 41.41 | -                         |
| Palmoplantar                                                                                                                                                                                                                                                                                                                   | 28               | 14.14 | -                         |
| Flexures                                                                                                                                                                                                                                                                                                                       | 55               | 27.78 | -                         |
| Genital                                                                                                                                                                                                                                                                                                                        | 23               | 11.79 | -                         |
| PS: Psoriasis.                                                                                                                                                                                                                                                                                                                 |                  |       |                           |
| Qualitative variables are shown as numbers (percentage, %). Lilliefors (Kolmogorov-Smirnov) normality test. Quantitative variables with a normal distribution are shown as mean ± standard deviation. Quantitative variables with a non-normal distribution are shown as p <sub>50</sub> (p <sub>25</sub> - p <sub>75</sub> ). |                  |       |                           |
