# Supplementary material for: Impact of Functional Polymorphisms on Drug Survival of Biological Therapies in Patients with Moderate-to-Severe Psoriasis
Source: MDPI journal article supplement (doi:10.3390/ijms24108703), 2023-05-12
Supplement: s1 [file s1]

Table S8. Desequilibrio de ligamiento

| Gene | Chr | BP        | SNP       | Chr | BP        | SNP        | R <sup>2</sup> | D     |
|------|-----|-----------|-----------|-----|-----------|------------|----------------|-------|
| IL1B | 2   | 112838252 | rs1143623 | 2   | 112836810 | rs1143627  | 0.595928       | 1     |
| TLR2 | 4   | 153685974 | rs4696480 | 4   | 153700794 | rs11938228 | 0.526891       | 0.829 |
| TNF  | 6   | 31575324  | rs361525  | 6   | 31574531  | rs1799964  | 0.295626       | 1     |

*Chr: Chromosome; BP: Physical position (base-pair).*
