# Supplementary material for: Impact of Functional Polymorphisms on Drug Survival of Biological Therapies in Patients with Moderate-to-Severe Psoriasis
Source: MDPI journal article supplement (doi:10.3390/ijms24108703), 2023-05-12
Supplement: s1 [file s1]

Table S4. Clinical characteristics and association with drug survival of the 247 PS patients' ANTI-TNF.

| Characteristic                                                                                                                                                                                                                                                                                                    |                     | Drug Survival (months)- ANTI-TNF (N=247) |        |          |        |                  |                      |           |         |
|-------------------------------------------------------------------------------------------------------------------------------------------------------------------------------------------------------------------------------------------------------------------------------------------------------------------|---------------------|------------------------------------------|--------|----------|--------|------------------|----------------------|-----------|---------|
|                                                                                                                                                                                                                                                                                                                   |                     | N                                        | Events | MST (mo) | IC95%  | Log-Rank p-value | Univariate Cox Model |           |         |
|                                                                                                                                                                                                                                                                                                                   |                     |                                          |        |          |        |                  | HR                   | IC95%     | p-value |
| Gender                                                                                                                                                                                                                                                                                                            | Female              | 122                                      | 97     | 19       | 12-28  | 0.1              |                      |           |         |
|                                                                                                                                                                                                                                                                                                                   | Male                | 125                                      | 96     | 30       | 20-44  |                  |                      |           |         |
| Age at baseline                                                                                                                                                                                                                                                                                                   |                     | 197                                      | 150    | -        | -      | -                | 0.987                | 0.97-0.99 | 0.041   |
|                                                                                                                                                                                                                                                                                                                   | <54 years           | 93                                       | 75     | 17       | 12-32  | 0.09             | 1                    |           |         |
|                                                                                                                                                                                                                                                                                                                   | >54 years           | 104                                      | 75     | 24       | 15-38  |                  | 0.754                | 0.54-1.04 | 0.088   |
| BMI at baseline                                                                                                                                                                                                                                                                                                   |                     | 245                                      | 192    | -        | -      | -                | 1.029                | 1.00-1.01 | 0.023   |
|                                                                                                                                                                                                                                                                                                                   | Normal weight       | 78                                       | 58     | 36       | 19-54  | 0.3              |                      |           |         |
|                                                                                                                                                                                                                                                                                                                   | Overweight          | 90                                       | 72     | 24       | 18-37  |                  |                      |           |         |
|                                                                                                                                                                                                                                                                                                                   | Obesity type I      | 45                                       | 35     | 23       | 11-30  |                  |                      |           |         |
|                                                                                                                                                                                                                                                                                                                   | Obesity type II     | 17                                       | 13     | 9        | 7-NA   |                  |                      |           |         |
|                                                                                                                                                                                                                                                                                                                   | Obesity type III    | 11                                       | 10     | 12       | 11-NA  |                  |                      |           |         |
|                                                                                                                                                                                                                                                                                                                   | Comorbidities       |                                          |        |          |        |                  |                      |           |         |
|                                                                                                                                                                                                                                                                                                                   | Psoriatic Arthritis | 129                                      | 108    | 24       | 17-30  | 0.2              |                      |           |         |
|                                                                                                                                                                                                                                                                                                                   | Hypertension        | 96                                       | 79     | 27       | 19-37  | 0.6              |                      |           |         |
|                                                                                                                                                                                                                                                                                                                   | Dyslipidemia        | 111                                      | 88     | 29       | 20-38  | 0.6              |                      |           |         |
|                                                                                                                                                                                                                                                                                                                   | Other comorbidities | 160                                      | 126    | 23       | 16-30  | 0.1              |                      |           |         |
| Age diagnosis PS                                                                                                                                                                                                                                                                                                  |                     | 247                                      | 193    | -        | -      | -                | 0.999                | 0.99-1.01 | 0.871   |
| Family history PS                                                                                                                                                                                                                                                                                                 |                     | 133                                      | 102    | 30       | 23-37  | 0.2              |                      |           |         |
| Type of PS                                                                                                                                                                                                                                                                                                        | Plaque              | 231                                      | 181    | 24       | 19-31  | 0.8              |                      |           |         |
|                                                                                                                                                                                                                                                                                                                   | Other types PS      | 16                                       | 12     | 13       | 3-NA   |                  |                      |           |         |
| Bio-naive                                                                                                                                                                                                                                                                                                         | Yes                 | 138                                      | 101    | 31       | 24-46  | 0.007            | 1                    |           |         |
|                                                                                                                                                                                                                                                                                                                   | No                  | 109                                      | 92     | 15       | 11-26  |                  | 1.473                | 1.10-1.95 | 0.007   |
| Treatment line general                                                                                                                                                                                                                                                                                            |                     | 247                                      | 193    | -        | -      | -                | 1.099                | 1.01-1.19 | 0.033   |
| Concomitant Treatment                                                                                                                                                                                                                                                                                             | Acitretin           | 2                                        | 0      | NA       | NA-NA  | 0.02             | 9.4*10 <sup>-8</sup> | 0-Inf     | 0.991   |
|                                                                                                                                                                                                                                                                                                                   | Cyclosporine        | 4                                        | 4      | 9.5      | 5-NA   |                  | 1.29                 | 0.47-3.5  | 0.614   |
|                                                                                                                                                                                                                                                                                                                   | Methotrexate        | 32                                       | 26     | 29       | 12-50  |                  | 0.957                | 0.62-1.46 | 0.839   |
|                                                                                                                                                                                                                                                                                                                   | Topics              | 55                                       | 34     | 37       | 24-110 |                  | 0.611                | 0.41-0.89 | 0.01    |
|                                                                                                                                                                                                                                                                                                                   | Monotherapy (No)    | 154                                      | 129    | 19       | 14-27  |                  | 1                    |           |         |
| Adherent BT                                                                                                                                                                                                                                                                                                       | Yes                 | 195                                      | 152    | 24       | 18-30  | 0.3              |                      |           |         |
|                                                                                                                                                                                                                                                                                                                   | No                  | 47                                       | 36     | 38       | 11-56  |                  |                      |           |         |
| Baseline PASI                                                                                                                                                                                                                                                                                                     |                     | 132                                      | 93     | -        | -      | -                | 1.011                | 0.99-1.03 | 0.351   |
|                                                                                                                                                                                                                                                                                                                   | <10                 | 68                                       | 45     | 29       | 11-53  | 0.4              |                      |           |         |
|                                                                                                                                                                                                                                                                                                                   | >10                 | 64                                       | 48     | 23       | 13-37  |                  |                      |           |         |
| MST: median survival time (months); HR: hazard ratio; IC95%: 95% confidence interval; NA: not achieved. Anti-TNF: Tumour Necrosis Factor inhibitor (adalimumab, certolizumab pegol, etanercept and infliximab); BMI: Body Mass Index; BT: Biological therapy; PASI: Psoriasis Area Severity Index; PS: Psoriasis. |                     |                                          |        |          |        |                  |                      |           |         |
| Statistically significant values are colored in grey, with a tendency to significance in bold.                                                                                                                                                                                                                    |                     |                                          |        |          |        |                  |                      |           |         |
