# Supplementary material for: Impact of Functional Polymorphisms on Drug Survival of Biological Therapies in Patients with Moderate-to-Severe Psoriasis
Source: MDPI journal article supplement (doi:10.3390/ijms24108703), 2023-05-12
Supplement: s1 [file s1]

Table S7. Equilibrium Hardy-Weinberg Drug Survival

| Chr | SNP        | Minor Allele | Major Allele | Genotype counts | Observed heterozygosity | Expected heterozygosity | p-value  | p-value verified* |
|-----|------------|--------------|--------------|-----------------|-------------------------|-------------------------|----------|-------------------|
| 1   | rs1061622  | G            | T            | 15/63/112       | 0.3316                  | 0.3697                  | 0.1689   | -                 |
| 1   | rs2916205  | C            | T            | 2/48/140        | 0.2526                  | 0.2362                  | 0.5383   | -                 |
| 1   | rs6427528  | A            | G            | 2/54/134        | 0.2842                  | 0.2587                  | 0.2613   | -                 |
| 1   | rs11209026 | A            | G            | 1/20/169        | 0.1053                  | 0.1091                  | 0.4752   | -                 |
| 1   | rs5744174  | G            | A            | 30/98/62        | 0.5158                  | 0.4858                  | 0.4564   | -                 |
| 1   | rs1801274  | G            | A            | 39/83/64        | 0.4462                  | 0.491                   | 0.2323   | -                 |
| 1   | rs396991   | C            | A            | 29/98/62        | 0.5185                  | 0.4848                  | 0.3715   | -                 |
| 2   | rs1143623  | G            | C            | 10/66/114       | 0.3474                  | 0.3502                  | 0.8388   | -                 |
| 2   | rs1143627  | G            | A            | 18/87/85        | 0.4579                  | 0.4378                  | 0.6199   | -                 |
| 3   | rs352139   | T            | C            | 42/95/52        | 0.5026                  | 0.4986                  | 1        | -                 |
| 4   | rs4696480  | T            | A            | 33/84/58        | 0.48                    | 0.4898                  | 0.8772   | -                 |
| 4   | rs11938228 | A            | C            | 29/75/76        | 0.4167                  | 0.4659                  | 0.1529   | -                 |
| 5   | rs3213094  | T            | C            | 9/63/118        | 0.3316                  | 0.3354                  | 0.8305   | -                 |
| 5   | rs2546890  | A            | G            | 43/98/49        | 0.5158                  | 0.4995                  | 0.7713   | -                 |
| 6   | rs13437088 | A            | C            | 23/84/82        | 0.4444                  | 0.4513                  | 0.872    | -                 |
| 6   | rs12191877 | T            | C            | 11/98/80        | 0.5185                  | 0.4334                  | 0.007438 | 0.7377            |
| 6   | rs361525   | A            | G            | 1/36/153        | 0.1895                  | 0.18                    | 0.6995   | -                 |
| 6   | rs1799724  | T            | C            | 1/48/141        | 0.2526                  | 0.2285                  | 0.2091   | -                 |
| 6   | rs1800629  | A            | G            | 0/48/142        | 0.2526                  | 0.2207                  | 0.04861  | 0.9694            |
| 6   | rs1799964  | C            | T            | 11/74/105       | 0.3895                  | 0.3776                  | 0.8474   | -                 |
| 6   | rs610604   | G            | T            | 24/86/79        | 0.455                   | 0.4577                  | 1        | -                 |
| 6   | rs6908425  | T            | C            | 8/48/134        | 0.2526                  | 0.2801                  | 0.1922   | -                 |
| 7   | rs1800795  | C            | G            | 21/82/87        | 0.4316                  | 0.4397                  | 0.8688   | -                 |
| 8   | rs11465996 | G            | C            | 15/58/91        | 0.3537                  | 0.3926                  | 0.2314   | -                 |
| 11  | rs8177374  | T            | C            | 11/57/122       | 0.3                     | 0.3293                  | 0.2675   | -                 |
| 12  | rs11045392 | T            | C            | 20/77/88        | 0.4162                  | 0.4324                  | 0.6117   | -                 |
| 22  | rs4819554  | G            | A            | 17/55/117       | 0.291                   | 0.36                    | 0.01382  | 0.9538            |

Chr: Chromosome; MAF: Minor Allele Frequency. P-value verified: Verification of linkage disequilibrium comparing with the frequencies described for the Iberian population. Statistically significant values are colored in grey.
