# Supplementary material for: Impact of Functional Polymorphisms on Drug Survival of Biological Therapies in Patients with Moderate-to-Severe Psoriasis
Source: MDPI journal article supplement (doi:10.3390/ijms24108703), 2023-05-12
Supplement: s1 [file s1]

Table S9. Polymorphisms and association with drug survival of the ANTI-TNF treatment patients.

OPCION 1: SNP PROTECTORES DEL RIESGO- 😊 RESPUESTA

| Gene           | SNPs                    | Genotype  | Drug Survival (months)- ANTI-TNF (N= 247) |        |          |       |                  |                      |            |         |  |  |  |
|----------------|-------------------------|-----------|-------------------------------------------|--------|----------|-------|------------------|----------------------|------------|---------|--|--|--|
|                |                         |           | N                                         | Events | MST (mo) | IC95% | Log-Rank p-value | Univariate Cox Model |            |         |  |  |  |
|                |                         |           |                                           |        |          |       |                  | HR                   | IC95%      | p-value |  |  |  |
| HLA-B/<br>MICA | rs13437088              | AA        | 40                                        | 30     | 34       | 24-55 | 0.7              |                      |            |         |  |  |  |
|                |                         | AC        | 108                                       | 82     | 23       | 16-31 |                  |                      |            |         |  |  |  |
|                |                         | CC        | 98                                        | 80     | 20       | 12-35 |                  |                      |            |         |  |  |  |
|                |                         | A         | 148                                       | 112    | 25       | 19-34 | 0.4              |                      |            |         |  |  |  |
|                |                         | C         | 206                                       | 162    | 23       | 16-30 | 0.7              |                      |            |         |  |  |  |
| HLA-C          | rs12191877              | CC        | 107                                       | 90     | 14       | 11-24 | 0.003            | 1                    |            |         |  |  |  |
|                |                         | CT        | 124                                       | 91     | 31       | 23-40 |                  | 0.618                | 0.46-0.83  | 0.0014  |  |  |  |
|                |                         | TT        | 13                                        | 9      | 35       | 16-NA |                  | 0.534                | 0.27-1.06  | 0.0744  |  |  |  |
|                |                         | C         | 231                                       | 181    | 24       | 18-30 | 0.3              |                      |            |         |  |  |  |
|                |                         | T         | 137                                       | 100    | 31       | 24-40 | 0.0007           | 0.609                | 0.46-0.81  | 0.00078 |  |  |  |
| TNF            | (TNF-238)<br>rs361525   | GG        | 204                                       | 169    | 21       | 16-29 | 0.009            | 0.815                | 0.33-1.99  | 0.6530  |  |  |  |
|                |                         | AG        | 37                                        | 19     | 44       | 28-NA |                  | 0.401                | 0.15-1.08  | 0.0702  |  |  |  |
|                |                         | AA        | 6                                         | 5      | 15       | 7-NA  |                  | 1                    |            |         |  |  |  |
|                |                         | G         | 241                                       | 188    | 24       | 19-31 | 0.5              |                      |            |         |  |  |  |
|                |                         | A         | 43                                        | 24     | 37       | 24-NA | 0.007            | 0.563                | 0.36-0.86  | 0.00871 |  |  |  |
|                | (TNF-857)<br>rs1799724  | CC        | 185                                       | 146    | 24       | 18-30 | 0.9              |                      |            |         |  |  |  |
|                |                         | CT        | 60                                        | 45     | 28       | 16-52 |                  |                      |            |         |  |  |  |
|                |                         | TT        | 2                                         | 2      | 62       | 37-NA |                  |                      |            |         |  |  |  |
|                |                         | C         | 245                                       | 191    | 24       | 18-30 | 0.7              |                      |            |         |  |  |  |
|                |                         | T         | 62                                        | 47     | 28       | 16-52 | 0.8              |                      |            |         |  |  |  |
|                | (TNF-308)<br>rs1800629  | GG        | 184                                       | 137    | 26       | 18-37 | 0.04             | 1                    |            |         |  |  |  |
|                |                         | AG        | 63                                        | 56     | 23       | 13-30 |                  | 0.724                | 0.53-0.99  | 0.0434  |  |  |  |
|                |                         | A         | 63                                        | 56     | 23       | 13-80 | 0.04             | 0.724                | 0.53-0.99  | 0.0434  |  |  |  |
|                | (TNF-1031)<br>rs1799964 | TT        | 145                                       | 124    | 20       | 15-27 | 0.003            | 0.947                | 0.55-1.62  | 0.8453  |  |  |  |
|                |                         | CT        | 85                                        | 54     | 44       | 25-70 |                  | 0.552                | 0.31-0.98  | 0.0438  |  |  |  |
|                |                         | CC        | 17                                        | 15     | 20       | 11-NA |                  | 1                    |            |         |  |  |  |
|                |                         | T         | 230                                       | 178    | 24       | 18-31 | 0.4              |                      |            |         |  |  |  |
|                |                         | C         | 102                                       | 69     | 36       | 23-56 | 0.004            | 0.648                | 0.48- 0.87 | 0.00442 |  |  |  |
|                | TNFRSF1B                | rs1061622 | TT                                        | 153    | 127      | 24    | 15-31            | 0.2                  |            |         |  |  |  |
| GT             |                         |           | 70                                        | 48     | 29       | 23-54 |                  |                      |            |         |  |  |  |
| GG             |                         |           | 24                                        | 18     | 17       | 11-56 |                  |                      |            |         |  |  |  |
| T              |                         |           | 223                                       | 175    | 24       | 19-31 | 0.9              |                      |            |         |  |  |  |
| G              |                         |           | 94                                        | 66     | 28       | 19-44 | 0.1              |                      |            |         |  |  |  |
| TNFAIP3        | rs610604                | GG        | 24                                        | 18     | 15       | 8-NA  | 0.9              |                      |            |         |  |  |  |
|                |                         | GT        | 124                                       | 96     | 24       | 17-37 |                  |                      |            |         |  |  |  |
|                |                         | TT        | 98                                        | 78     | 25       | 16-36 |                  |                      |            |         |  |  |  |
|                |                         | G         | 148                                       | 114    | 23       | 17-34 | 0.8              |                      |            |         |  |  |  |
|                |                         | T         | 222                                       | 174    | 24       | 19-31 | 0.8              |                      |            |         |  |  |  |
| IL1B           | rs1143623               | CC        | 146                                       | 114    | 23       | 17-31 | 0.6              |                      |            |         |  |  |  |
|                |                         | CG        | 81                                        | 62     | 30       | 16-38 |                  |                      |            |         |  |  |  |
|                |                         | GG        | 20                                        | 17     | 15       | 8-46  |                  |                      |            |         |  |  |  |
|                |                         | C         | 227                                       | 176    | 24       | 19-31 | 0.4              |                      |            |         |  |  |  |
|                |                         | G         | 101                                       | 79     | 28       | 14-37 | 0.6              |                      |            |         |  |  |  |
|                | rs1143627               | GG        | 28                                        | 24     | 21.5     | 8-44  | 0.4              |                      |            |         |  |  |  |
|                |                         | AG        | 105                                       | 77     | 34       | 20-41 |                  |                      |            |         |  |  |  |
|                |                         | AA        | 114                                       | 92     | 20       | 16-28 |                  |                      |            |         |  |  |  |
|                |                         | G         | 133                                       | 101    | 30       | 19-37 | 0.5              |                      |            |         |  |  |  |

|           |            |     |     |       |       |       |      |  |  |  |       |           |       |
|-----------|------------|-----|-----|-------|-------|-------|------|--|--|--|-------|-----------|-------|
|           |            | A   | 219 | 169   | 24    | 18-34 | 0.4  |  |  |  |       |           |       |
| IL6       | rs1800795  | CC  | 21  | 14    | 17    | 11-NA | 0.7  |  |  |  |       |           |       |
|           |            | CG  | 101 | 75    | 27    | 18-37 |      |  |  |  |       |           |       |
|           |            | GG  | 125 | 104   | 23    | 16-34 |      |  |  |  |       |           |       |
|           |            | C   | 122 | 89    | 25    | 18-37 | 0.4  |  |  |  |       |           |       |
|           |            | G   | 226 | 179   | 24    | 19-34 | 0.8  |  |  |  |       |           |       |
| IL12β     | rs3213094  | CC  | 162 | 126   | 25    | 19-36 | 0.4  |  |  |  |       |           |       |
|           |            | CT  | 78  | 60    | 24    | 13-37 |      |  |  |  |       |           |       |
|           |            | TT  | 6   | 6     | 17.5  | 3-NA  |      |  |  |  |       |           |       |
|           |            | C   | 240 | 186   | 24    | 19-31 | 0.2  |  |  |  |       |           |       |
|           |            | T   | 84  | 66    | 23    | 13-32 | 0.5  |  |  |  |       |           |       |
|           | rs2546890  | AA  | 55  | 43    | 18    | 12-40 | 0.8  |  |  |  |       |           |       |
|           |            | AG  | 138 | 108   | 23    | 17-34 |      |  |  |  |       |           |       |
|           |            | GG  | 54  | 42    | 30    | 23-52 |      |  |  |  |       |           |       |
|           |            | A   | 193 | 151   | 21    | 17-30 | 0.5  |  |  |  |       |           |       |
| G         | 192        | 150 | 24  | 19-34 | 0.9   |       |      |  |  |  |       |           |       |
| TIRAP     | rs8177374  | CC  | 164 | 128   | 23    | 16-30 | 0.2  |  |  |  |       |           |       |
|           |            | CT  | 70  | 54    | 34    | 23-56 |      |  |  |  |       |           |       |
|           |            | TT  | 13  | 11    | 8     | 2-NA  |      |  |  |  |       |           |       |
|           |            | C   | 234 | 182   | 24    | 19-34 | 0.2  |  |  |  |       |           |       |
|           |            | T   | 83  | 65    | 28    | 18-52 | 0.4  |  |  |  |       |           |       |
| PGLYR4-24 | rs2916205  | CC  | 2   | 0     | NA    | NA-NA | 0.3  |  |  |  |       |           |       |
|           |            | CT  | 73  | 59    | 18    | 12-30 |      |  |  |  |       |           |       |
|           |            | TT  | 172 | 134   | 26    | 20-36 |      |  |  |  |       |           |       |
|           |            | C   | 75  | 59    | 18    | 14-34 | 0.6  |  |  |  |       |           |       |
|           |            | T   | 245 | 193   | 24    | 18-30 | 0.2  |  |  |  |       |           |       |
| CDKALI    | rs6908425  | TT  | 9   | 6     | 98    | 47-NA | 0.2  |  |  |  |       |           |       |
|           |            | CT  | 66  | 50    | 24    | 16-37 |      |  |  |  |       |           |       |
|           |            | CC  | 172 | 137   | 24    | 16-32 |      |  |  |  |       |           |       |
|           |            | T   | 75  | 56    | 28    | 20-40 | 0.4  |  |  |  | 1     |           |       |
|           |            | C   | 238 | 187   | 24    | 18-30 | 0.09 |  |  |  | 1.991 | 0.88-4.49 | 0.097 |
| CD84      | rs6427528  | AA  | 5   | 4     | 18    | 10-NA | 0.8  |  |  |  |       |           |       |
|           |            | AG  | 65  | 53    | 20    | 13-37 |      |  |  |  |       |           |       |
|           |            | GG  | 177 | 136   | 27    | 19-36 |      |  |  |  |       |           |       |
|           |            | A   | 70  | 57    | 18    | 13-32 | 0.5  |  |  |  |       |           |       |
|           |            | G   | 242 | 189   | 24    | 19-31 | 0.7  |  |  |  |       |           |       |
| IL17RA    | rs4819554  | GG  | 17  | 12    | 34    | 27-NA | 0.3  |  |  |  |       |           |       |
|           |            | AG  | 75  | 59    | 28    | 14-46 |      |  |  |  |       |           |       |
|           |            | AA  | 154 | 122   | 21    | 15-30 |      |  |  |  |       |           |       |
|           |            | G   | 92  | 71    | 30    | 20-46 | 0.2  |  |  |  |       |           |       |
|           |            | A   | 229 | 181   | 23    | 17-30 | 0.2  |  |  |  |       |           |       |
| IL23R     | rs11209026 | GG  | 215 | 164   | 24    | 18-31 | 0.6  |  |  |  |       |           |       |
|           |            | AG  | 30  | 28    | 22    | 11-46 |      |  |  |  |       |           |       |
|           |            | AA  | 1   | 1     | 110   | NA-NA |      |  |  |  |       |           |       |
|           |            | G   | 245 | 192   | 24    | 18-30 | 0.6  |  |  |  |       |           |       |
|           |            | A   | 31  | 29    | 25    | 11-54 | 0.5  |  |  |  |       |           |       |
| TLR2      | rs4696480  | TT  | 49  | 39    | 23    | 15-37 | 0.9  |  |  |  |       |           |       |
|           |            | AT  | 98  | 73    | 24    | 16-36 |      |  |  |  |       |           |       |
|           |            | AA  | 67  | 53    | 18    | 12-50 |      |  |  |  |       |           |       |
|           |            | T   | 147 | 112   | 24    | 18-34 | 0.7  |  |  |  |       |           |       |
|           |            | A   | 165 | 126   | 23    | 15-31 | 0.7  |  |  |  |       |           |       |
|           | rs11938228 | CC  | 97  | 76    | 21    | 13-28 | 0.7  |  |  |  |       |           |       |
|           |            | AC  | 86  | 68    | 28    | 16-41 |      |  |  |  |       |           |       |
|           |            | AA  | 42  | 29    | 32    | 18-61 |      |  |  |  |       |           |       |
| C         |            | 183 | 144 | 24    | 15-30 | 0.4   |      |  |  |  |       |           |       |

|               |                      |    |     |     |    |       |     |  |  |  |
|---------------|----------------------|----|-----|-----|----|-------|-----|--|--|--|
|               |                      | A  | 128 | 97  | 30 | 18-38 | 0.5 |  |  |  |
| TLR5          | rs5744174            | AA | 86  | 68  | 21 | 14-44 | 0.9 |  |  |  |
|               |                      | AG | 120 | 90  | 24 | 17-36 |     |  |  |  |
|               |                      | GG | 41  | 35  | 28 | 12-54 |     |  |  |  |
|               |                      | A  | 206 | 158 | 24 | 18-34 | 0.8 |  |  |  |
|               |                      | G  | 161 | 125 | 26 | 19-34 | 0.9 |  |  |  |
| TLR9          | rs352139             | TT | 54  | 45  | 24 | 16-37 | 0.6 |  |  |  |
|               |                      | CT | 131 | 103 | 24 | 16-36 |     |  |  |  |
|               |                      | CC | 61  | 44  | 24 | 14-54 |     |  |  |  |
|               |                      | T  | 185 | 148 | 24 | 18-32 |     |  |  |  |
|               |                      | C  | 192 | 147 | 24 | 17-32 | 0.8 |  |  |  |
| PDE3A-SLC01C1 | rs11045392-rs3794271 | TT | 39  | 34  | 20 | 15-46 | 0.6 |  |  |  |
|               |                      | CT | 86  | 67  | 23 | 11-34 |     |  |  |  |
|               |                      | CC | 112 | 82  | 27 | 19-44 |     |  |  |  |
|               |                      | T  | 125 | 101 | 20 | 14-31 | 0.3 |  |  |  |
|               |                      | C  | 198 | 149 | 24 | 17-34 | 0.5 |  |  |  |
| FCGR2A        | rs1801274            | AA | 87  | 69  | 19 | 12-31 | 0.5 |  |  |  |
|               |                      | AG | 104 | 77  | 28 | 18-44 |     |  |  |  |
|               |                      | GG | 42  | 34  | 27 | 11-52 |     |  |  |  |
|               |                      | A  | 191 | 146 | 24 | 18-34 | 0.6 |  |  |  |
|               |                      | G  | 146 | 111 | 28 | 19-37 | 0.5 |  |  |  |
| FCGR3A        | rs396991             | AA | 84  | 65  | 30 | 19-40 | 0.8 |  |  |  |
|               |                      | AC | 128 | 99  | 19 | 13-31 |     |  |  |  |
|               |                      | CC | 34  | 28  | 27 | 23-56 |     |  |  |  |
|               |                      | A  | 212 | 164 | 24 | 18-32 | 0.8 |  |  |  |
|               |                      | C  | 162 | 127 | 23 | 16-30 | 0.5 |  |  |  |

MST: median survival time (months); HR: hazard ratio; IC95%: 95% confidence interval; NA: not achieved; Anti-TNF: Tumour Necrosis Factor inhibitor (adalimumab, certolizumab pegol, etanercept and infliximab); PS: Psoriasis.  
Statistically significant values are colored in grey, with a tendency to significance in bold.

## OPCION 2: SNP RIESGO- SNP 😞 RESPUESTA

| Gene                   | SNPs                    | Genotype | Drug Survival (months)- ANTI-TNF (N= 247) |        |          |       |                  |                      |            |               |
|------------------------|-------------------------|----------|-------------------------------------------|--------|----------|-------|------------------|----------------------|------------|---------------|
|                        |                         |          | N                                         | Events | MST (mo) | IC95% | Log-Rank p-value | Univariate Cox Model |            |               |
|                        |                         |          |                                           |        |          |       |                  | HR                   | IC95%      | p-value       |
| <b>HLA-B/<br/>MICA</b> | rs13437088              | AA       | 40                                        | 30     | 34       | 24-55 | 0.7              |                      |            |               |
|                        |                         | AC       | 108                                       | 82     | 23       | 16-31 |                  |                      |            |               |
|                        |                         | CC       | 98                                        | 80     | 20       | 12-35 |                  |                      |            |               |
|                        |                         | A        | 148                                       | 112    | 25       | 19-34 | 0.4              |                      |            |               |
|                        |                         | C        | 206                                       | 162    | 23       | 16-30 | 0.7              |                      |            |               |
| <b>HLA-C</b>           | rs12191877              | CC       | 107                                       | 90     | 14       | 11-24 | 0.003            | 1.87                 | 0.94-3.72  | 0.677         |
|                        |                         | CT       | 124                                       | 91     | 31       | 23-40 |                  | 1.157                | 0.58-2.29  | <b>0.07</b>   |
|                        |                         | TT       | 13                                        | 9      | 35       | 16-NA |                  | 1                    |            |               |
|                        |                         | C        | 231                                       | 181    | 24       | 18-30 | 0.3              |                      |            |               |
|                        |                         | T        | 137                                       | 100    | 31       | 24-40 | 0.0007           | 0.609                | 0.46-0.81  | 0.00078       |
| <b>TNF</b>             | (TNF-238)<br>rs361525   | GG       | 204                                       | 169    | 21       | 16-29 | 0.009            | 0.815                | 0.33-1.99  | 0.6530        |
|                        |                         | AG       | 37                                        | 19     | 44       | 28-NA |                  | 0.401                | 0.15-1.08  | <b>0.0702</b> |
|                        |                         | AA       | 6                                         | 5      | 15       | 7-NA  |                  | 1                    |            |               |
|                        |                         | G        | 241                                       | 188    | 24       | 19-31 | 0.5              |                      |            |               |
|                        |                         | A        | 43                                        | 24     | 37       | 24-NA | 0.007            | 0.563                | 0.36-0.86  | 0.00871       |
|                        | (TNF-857)<br>rs1799724  | CC       | 185                                       | 146    | 24       | 18-30 | 0.9              |                      |            |               |
|                        |                         | CT       | 60                                        | 45     | 28       | 16-52 |                  |                      |            |               |
|                        |                         | TT       | 2                                         | 2      | 62       | 37-NA |                  |                      |            |               |
|                        |                         | C        | 245                                       | 191    | 24       | 18-30 | 0.7              |                      |            |               |
|                        | (TNF-308)<br>rs1800629  | T        | 62                                        | 47     | 28       | 16-52 | 0.8              |                      |            |               |
|                        |                         | GG       | 184                                       | 137    | 26       | 18-37 | 0.04             | 1                    |            |               |
|                        |                         | AG       | 63                                        | 56     | 23       | 13-30 |                  | 0.724                | 0.53-0.99  | 0.0434        |
|                        |                         | A        | 63                                        | 56     | 23       | 13-80 |                  | 0.724                | 0.53-0.99  | 0.0434        |
|                        | (TNF-1031)<br>rs1799964 | TT       | 145                                       | 124    | 20       | 15-27 | 0.003            | 0.947                | 0.55-1.62  | 0.8453        |
|                        |                         | CT       | 85                                        | 54     | 44       | 25-70 |                  | 0.552                | 0.31-0.98  | 0.0438        |
|                        |                         | CC       | 17                                        | 15     | 20       | 11-NA |                  | 1                    |            |               |
|                        |                         | T        | 230                                       | 178    | 24       | 18-31 | 0.4              |                      |            |               |
|                        |                         | C        | 102                                       | 69     | 36       | 23-56 | 0.004            | 0.648                | 0.48- 0.87 | 0.00442       |
| <b>TNFRSF1B</b>        | rs1061622               | TT       | 153                                       | 127    | 24       | 15-31 | 0.2              |                      |            |               |
|                        |                         | GT       | 70                                        | 48     | 29       | 23-54 |                  |                      |            |               |
|                        |                         | GG       | 24                                        | 18     | 17       | 11-56 |                  |                      |            |               |
|                        |                         | T        | 223                                       | 175    | 24       | 19-31 | 0.9              |                      |            |               |
|                        |                         | G        | 94                                        | 66     | 28       | 19-44 | 0.1              |                      |            |               |
| <b>TNFAIP3</b>         | rs610604                | GG       | 24                                        | 18     | 15       | 8-NA  | 0.9              |                      |            |               |
|                        |                         | GT       | 124                                       | 96     | 24       | 17-37 |                  |                      |            |               |
|                        |                         | TT       | 98                                        | 78     | 25       | 16-36 |                  |                      |            |               |
|                        |                         | G        | 148                                       | 114    | 23       | 17-34 | 0.8              |                      |            |               |
|                        |                         | T        | 222                                       | 174    | 24       | 19-31 | 0.8              |                      |            |               |
| <b>IL1B</b>            | rs1143623               | CC       | 146                                       | 114    | 23       | 17-31 | 0.6              |                      |            |               |
|                        |                         | CG       | 81                                        | 62     | 30       | 16-38 |                  |                      |            |               |
|                        |                         | GG       | 20                                        | 17     | 15       | 8-46  |                  |                      |            |               |
|                        |                         | C        | 227                                       | 176    | 24       | 19-31 | 0.4              |                      |            |               |
|                        |                         | G        | 101                                       | 79     | 28       | 14-37 | 0.6              |                      |            |               |
|                        | rs1143627               | GG       | 28                                        | 24     | 21.5     | 8-44  | 0.4              |                      |            |               |
|                        |                         | AG       | 105                                       | 77     | 34       | 20-41 |                  |                      |            |               |
|                        |                         | AA       | 114                                       | 92     | 20       | 16-28 |                  |                      |            |               |
|                        |                         | G        | 133                                       | 101    | 30       | 19-37 | 0.5              |                      |            |               |
|                        |                         | A        | 219                                       | 169    | 24       | 18-34 | 0.4              |                      |            |               |
| <b>IL6</b>             | rs1800795               | CC       | 21                                        | 14     | 17       | 11-NA | 0.7              |                      |            |               |

|                  |                   |    |     |     |      |       |             |   |  |           |              |
|------------------|-------------------|----|-----|-----|------|-------|-------------|---|--|-----------|--------------|
|                  |                   | CG | 101 | 75  | 27   | 18-37 |             |   |  |           |              |
|                  |                   | GG | 125 | 104 | 23   | 16-34 |             |   |  |           |              |
|                  |                   | C  | 122 | 89  | 25   | 18-37 |             |   |  | 0.4       |              |
|                  |                   | G  | 226 | 179 | 24   | 19-34 |             |   |  | 0.8       |              |
| <i>IL12β</i>     | <i>rs3213094</i>  | CC | 162 | 126 | 25   | 19-36 | 0.4         |   |  |           |              |
|                  |                   | CT | 78  | 60  | 24   | 13-37 |             |   |  |           |              |
|                  |                   | TT | 6   | 6   | 17.5 | 3-NA  |             |   |  |           |              |
|                  |                   | C  | 240 | 186 | 24   | 19-31 |             |   |  |           | 0.2          |
|                  |                   | T  | 84  | 66  | 23   | 13-32 |             |   |  |           | 0.5          |
|                  | <i>rs2546890</i>  | AA | 55  | 43  | 18   | 12-40 | 0.8         |   |  |           |              |
|                  |                   | AG | 138 | 108 | 23   | 17-34 |             |   |  |           |              |
|                  |                   | GG | 54  | 42  | 30   | 23-52 |             |   |  |           |              |
|                  |                   | A  | 193 | 151 | 21   | 17-30 |             |   |  |           | 0.5          |
|                  |                   | G  | 192 | 150 | 24   | 19-34 |             |   |  |           | 0.9          |
| <i>TIRAP</i>     | <i>rs8177374</i>  | CC | 164 | 128 | 23   | 16-30 | 0.2         |   |  |           |              |
|                  |                   | CT | 70  | 54  | 34   | 23-56 |             |   |  |           |              |
|                  |                   | TT | 13  | 11  | 8    | 2-NA  |             |   |  |           |              |
|                  |                   | C  | 234 | 182 | 24   | 19-34 |             |   |  |           | 0.2          |
|                  |                   | T  | 83  | 65  | 28   | 18-52 |             |   |  |           | 0.4          |
| <i>PGLYR4-24</i> | <i>rs2916205</i>  | CC | 2   | 0   | NA   | NA-NA | 0.3         |   |  |           |              |
|                  |                   | CT | 73  | 59  | 18   | 12-30 |             |   |  |           |              |
|                  |                   | TT | 172 | 134 | 26   | 20-36 |             |   |  |           |              |
|                  |                   | C  | 75  | 59  | 18   | 14-34 |             |   |  |           | 0.6          |
|                  |                   | T  | 245 | 193 | 24   | 18-30 |             |   |  |           | 0.2          |
| <i>CDKALI</i>    | <i>rs6908425</i>  | TT | 9   | 6   | 98   | 47-NA | 0.2         | 1 |  | 0.88-4.49 | <b>0.097</b> |
|                  |                   | CT | 66  | 50  | 24   | 16-37 |             |   |  |           |              |
|                  |                   | CC | 172 | 137 | 24   | 16-32 |             |   |  |           |              |
|                  |                   | T  | 75  | 56  | 28   | 20-40 | 0.4         |   |  |           |              |
|                  |                   | C  | 238 | 187 | 24   | 18-30 | <b>0.09</b> |   |  |           |              |
| <i>CD84</i>      | <i>rs6427528</i>  | AA | 5   | 4   | 18   | 10-NA | 0.8         |   |  |           |              |
|                  |                   | AG | 65  | 53  | 20   | 13-37 |             |   |  |           |              |
|                  |                   | GG | 177 | 136 | 27   | 19-36 |             |   |  |           |              |
|                  |                   | A  | 70  | 57  | 18   | 13-32 | 0.5         |   |  |           |              |
|                  |                   | G  | 242 | 189 | 24   | 19-31 | 0.7         |   |  |           |              |
| <i>IL17RA</i>    | <i>rs4819554</i>  | GG | 17  | 12  | 34   | 27-NA | 0.3         |   |  |           |              |
|                  |                   | AG | 75  | 59  | 28   | 14-46 |             |   |  |           |              |
|                  |                   | AA | 154 | 122 | 21   | 15-30 |             |   |  |           |              |
|                  |                   | G  | 92  | 71  | 30   | 20-46 | 0.2         |   |  |           |              |
|                  |                   | A  | 229 | 181 | 23   | 17-30 | 0.2         |   |  |           |              |
| <i>IL23R</i>     | <i>rs11209026</i> | GG | 215 | 164 | 24   | 18-31 | 0.6         |   |  |           |              |
|                  |                   | AG | 30  | 28  | 22   | 11-46 |             |   |  |           |              |
|                  |                   | AA | 1   | 1   | 110  | NA-NA |             |   |  |           |              |
|                  |                   | G  | 245 | 192 | 24   | 18-30 | 0.6         |   |  |           |              |
|                  |                   | A  | 31  | 29  | 25   | 11-54 | 0.5         |   |  |           |              |
| <i>TLR2</i>      | <i>rs4696480</i>  | TT | 49  | 39  | 23   | 15-37 | 0.9         |   |  |           |              |
|                  |                   | AT | 98  | 73  | 24   | 16-36 |             |   |  |           |              |
|                  |                   | AA | 67  | 53  | 18   | 12-50 |             |   |  |           |              |
|                  |                   | T  | 147 | 112 | 24   | 18-34 |             |   |  |           | 0.7          |
|                  |                   | A  | 165 | 126 | 23   | 15-31 |             |   |  |           | 0.7          |
|                  | <i>rs11938228</i> | CC | 97  | 76  | 21   | 13-28 | 0.7         |   |  |           |              |
|                  |                   | AC | 86  | 68  | 28   | 16-41 |             |   |  |           |              |
|                  |                   | AA | 42  | 29  | 32   | 18-61 |             |   |  |           |              |
|                  |                   | C  | 183 | 144 | 24   | 15-30 | 0.4         |   |  |           |              |
|                  |                   | A  | 128 | 97  | 30   | 18-38 | 0.5         |   |  |           |              |
