# Supplementary material for: Impact of Functional Polymorphisms on Drug Survival of Biological Therapies in Patients with Moderate-to-Severe Psoriasis
Source: MDPI journal article supplement (doi:10.3390/ijms24108703), 2023-05-12
Supplement: s1 [file s1]

Table S5. Clinical characteristics and association with drug survival of the 132 psoriasis patients treated with Ustekinumab.

| Characteristic         |                         | Drug Survival (months)- Anti-IL12/23 (N=132) |        |          |        |                  |                      |            |               |
|------------------------|-------------------------|----------------------------------------------|--------|----------|--------|------------------|----------------------|------------|---------------|
|                        |                         | N                                            | Events | MST (mo) | IC95%  | Log-Rank p-value | Univariate Cox Model |            |               |
|                        |                         |                                              |        |          |        |                  | HR                   | IC95%      | p-value       |
| Gender                 | Female                  | 77                                           | 54     | 32       | 23-42  | 0.3              |                      |            |               |
|                        | Male                    | 55                                           | 33     | 39       | 23-94  |                  |                      |            |               |
| Age at baseline        |                         | 127                                          | 84     | -        | -      | -                | 1.01                 | 0.99-1.02  | 0.203         |
| BMI at baseline        |                         | 132                                          | 87     | -        | -      | -                | 1.02                 | 0.99- 1.05 | 0.21          |
|                        | Normal weight           | 36                                           | 21     | 37       | 27-NA  | <b>0.08</b>      | 1                    |            |               |
|                        | Overweight              | 42                                           | 29     | 25       | 20-46  |                  | 1.419                | 0.81-2.50  | 0.223         |
|                        | Obesity type I          | 31                                           | 21     | 33       | 21-78  |                  | 1.253                | 0.68-2.3   | 0.466         |
|                        | Obesity type II         | 12                                           | 11     | 14.5     | 8-NA   |                  | 2.733                | 1.30-5.73  | 0.0078        |
|                        | Obesity type III        | 7                                            | 4      | 48       | 18-NA  |                  | 0.871                | 0.298-2.53 | 0.799         |
| Comorbidities          |                         |                                              |        |          |        |                  |                      |            |               |
|                        | Psoriatic Arthritis Yes | 63                                           | 49     | 21       | 19-36  | 0.003            | 1.899                | 1.24-2.91  | 0.0033        |
|                        | No                      | 69                                           | 38     | 48       | 37-94  |                  | 1                    |            |               |
|                        | Hypertension            | 41                                           | 29     | 36       | 25-57  | 0.9              |                      |            |               |
|                        | Dyslipidemia            | 57                                           | 39     | 25       | 20-42  | 0.2              |                      |            |               |
|                        | Other comorbidities     | 94                                           | 60     | 36       | 25-48  | 0.4              |                      |            |               |
| Age diagnosis PS       |                         | 132                                          | 87     | -        | -      | -                | 1.005                | 0.99-1.02  | 0.48          |
| Family history PS      |                         | 77                                           | 48     | 36       | 20-72  | 0.4              |                      |            |               |
| Type of PS             | Plaque                  | 121                                          | 80     | 34       | 24-46  | 0.8              |                      |            |               |
|                        | Other types of PS       | 11                                           | 7      | 37       | 15-NA  |                  |                      |            |               |
| Bio-naïve              |                         | 44                                           | 26     | 41       | 33-NA  | <b>0.09</b>      | 0.671                | 0.42-1.06  | <b>0.0887</b> |
| Treatment line general |                         | 132                                          | 87     | -        | -      | -                | 1.006                | 0.90-1.12  | 0.911         |
| Concomitant Tt.        | Cyclosporine            | 2                                            | 2      | 11       | 8-NA   | 0.03             | 1                    |            |               |
|                        | Methotrexate            | 20                                           | 15     | 37.5     | 25-NA  |                  | 0.178                | 0.04-0.81  | 0.025         |
|                        | Topics                  | 47                                           | 28     | 41       | 32-122 |                  | 0.153                | 0.04- 0.66 | 0.012         |
|                        | Monotherapy (No)        | 63                                           | 42     | 23       | 18-44  |                  | 0.224                | 0.05-0.95  | 0.043         |
| Adherent BT            | Yes                     | 98                                           | 63     | 26       | 20-39  | <b>0.08</b>      | 1                    |            |               |
|                        | No                      | 33                                           | 23     | 57       | 40-112 |                  | 0.647                | 0.39-1.05  | <b>0.0809</b> |
| Baseline PASI          |                         | 107                                          | 69     | -        | -      | -                | 0.998                | 0.95-1.05  | 0.938         |
|                        | <8                      | 55                                           | 38     | 37       | 21-67  | 0.5              |                      |            |               |
|                        | >8                      | 52                                           | 31     | 34       | 20-NA  |                  |                      |            |               |

Concomitant Tt. : Concomitant Treatment; MST: median survival time (months); HR: hazard ratio; IC95%: 95% confidence interval; NA: not achieved. Anti-IL12/23: interleukin 12 and interleukin 23 inhibitor (ustekinumab); BMI: Body Mass Index; BT: Biological therapy; PASI: Psoriasis Area Severity Index; PS: Psoriasis.

Statistically significant values are colored in grey, with a tendency to significance in bold.
